# Supplementary material for: Vaccine Research in COVID-19: A Living Scoping Review Protocol
Source: Research Square preprint supplement (doi:10.21203/rs.3.rs-112777/v1), 2020-11-23
Supplement: Supplementary file 1 [file 43069bd348e4eecefb78c63e.docx]

| **Additional file 2. Search strategy** |
| --- |
| **1.PubMed** |
| #1 "COVID19"[Title/Abstract] OR "COVID-19"[Title/Abstract] OR "COVID2019"[Title/Abstract] OR "COVID-2019"[Title/Abstract] OR "2019 novel coronavirus infection"[Title/Abstract] OR "2019nCoV"[Title/Abstract] OR "coronavirus disease 2019"[Title/Abstract] OR "coronavirus disease-19"[Title/Abstract] OR "Wuhan coronavirus"[Title/Abstract] OR "SARS-CoV-2"[Title/Abstract] OR "2019 novel coronavirus"[Title/Abstract] OR "Wuhan-Cov"[Title/Abstract] OR "Wuhan seafood market pneumonia virus"[Title/Abstract] OR "Wuhan virus"[Title/Abstract] OR "novel coronavirus pneumonia"[Title/Abstract] OR "Severe acute respiratory syndrome-related coronavirus"[Title/Abstract] OR "Novel CoV"[Title/Abstract] OR "severe acute respiratory syndrome coronavirus 2"[Title/Abstract] "Vaccines"[Mesh] |
| #2 "Vaccines"[Mesh] |
| #3 "Vaccination Coverage"[Mesh] |
| #4 "Immunization Programs"[Mesh] |
| #5 "Immunization Programs"[Title/Abstract] OR "Immunization Program"[Title/Abstract OR vaccin*[Title/Abstract] OR Vacuna [Title/Abstract] OR Inoculation [Title/Abstract]] |
| #6 #2 OR #3 OR #4 OR #5 |
| #7 #1 AND #6 |
| **2.Embase** |
| **#1** 'covid19'/exp OR 'covid19':ab,ti OR 'covid 19'/exp OR 'covid 19':ab,ti OR 'covid2019':ab,ti OR 'covid 2019'/exp OR 'covid 2019':ab,ti OR '2019 novel coronavirus infection':ab,ti OR 'coronavirus disease 2019'/exp OR 'coronavirus disease 2019':ab,ti OR 'coronavirus disease-19':ab,ti OR '2019 ncov'/exp OR 'wuhan coronavirus'/exp OR 'wuhan coronavirus':ab,ti OR 'sars-cov-2'/exp OR 'sars-cov-2':ab,ti OR '2019 novel coronavirus'/exp OR '2019 novel coronavirus':ab,ti OR 'wuhan cov':ab,ti OR 'wuhan seafood market pneumonia virus'/exp OR 'wuhan seafood market pneumonia virus':ab,ti OR 'wuhan virus':ab,ti OR 'novel coronavirus pneumonia':ab,ti OR 'severe acute respiratory syndrome-related coronavirus'/exp OR 'severe acute respiratory syndrome-related coronavirus':ab,ti OR 'novel cov' OR 'severe acute respiratory syndrome coronavirus 2'/exp OR 'severe acute respiratory syndrome coronavirus 2':ab,ti  **#2** 'vaccines'/exp OR vaccin*:ab,ti OR vacuna:ab,ti OR 'inoculation'/exp OR inoculation:ab,ti OR 'immunization programs'/exp OR 'immunization programs':ab,ti OR 'immunization program':ab,ti  **#3 #**1 AND #2 |
| **3. Cochrane** |
| #1 “COVID19” OR “COVID-19” OR “COVID2019” OR “COVID-2019” OR “2019 novel coronavirus infection” OR “coronavirus disease 2019” OR “coronavirus disease-19” OR “2019nCoV” OR “Wuhan coronavirus” OR “SARS-CoV-2” OR “2019 novel coronavirus” OR “Wuhan-Cov” OR “Wuhan seafood market pneumonia virus” OR “Wuhan virus” OR “novel coronavirus pneumonia” OR “Severe acute respiratory syndrome-related coronavirus” OR “Novel CoV” OR “severe acute respiratory syndrome coronavirus 2”  #2 MeSH descriptor: [Vaccines] in all MeSH products |
| #3 “Immunization Program” OR “Immunization Programs” OR Vaccin* OR Vacuna OR Inoculation |
| #4 #2 OR #3 |
| #5 #1 AND #4 |
| **4. Web of Science** |
| TOPIC: (“COVID19” OR “COVID-19” OR “COVID2019” OR “COVID-2019” OR “2019 novel coronavirus infection” OR “2019nCoV” OR “coronavirus disease 2019” OR “coronavirus disease-19” OR “Wuhan coronavirus” OR “SARS-CoV-2” OR “2019 novel coronavirus” OR “Wuhan-Cov” OR “Wuhan seafood market pneumonia virus” OR “Wuhan virus” OR “novel coronavirus pneumonia” OR “Severe acute respiratory syndrome-related coronavirus” OR “Novel CoV” OR “severe acute respiratory syndrome coronavirus 2”) AND TOPIC: (“Immunization Program” OR “Immunization Programs” OR Vaccin* OR Vacuna OR Inoculation) |
| **5. CNKI** |
| 主题=('新型冠状病毒'+'武汉冠状病毒'+'武汉肺炎'+'新冠肺炎'+'2019-nCoV'+'2019-CoV'+'SARS-CoV-2'+'COVID19'+'COVID-19'+'COVID2019'+'COVID-2019') AND '疫苗' |
| **6. CBM** |
| #1 “新型冠状病毒”[常用字段:智能] OR “武汉冠状病毒”[常用字段:智能] OR “武汉肺炎”[常用字段:智能] OR “新冠肺炎”[常用字段:智能] OR “2019-nCoV”[常用字段:智能] OR “2019-CoV”[常用字段:智能] OR “SARS-CoV-2”[常用字段:智能] OR “COVID19”[常用字段:智能] OR “COVID-19”[常用字段:智能] OR “COVID2019”[常用字段:智能] OR “COVID-2019”[常用字段:智能] |
| #2 “疫苗”[常用字段:智能] |
| #3 #1 AND #2 |
| **7. WanFang** |
| 主题:("新型冠状病毒"+"武汉冠状病毒"+"武汉肺炎"+"新冠肺炎"+"2019-nCoV"+"2019-CoV"+"SARS-CoV-2"+"COVID19"+"COVID-19"+"COVID2019"+"COVID-2019") AND "疫苗" |
| **8．VIP** |
| 题名或关键词=("新型冠状病毒" OR "武汉冠状病毒" OR "武汉肺炎" OR "新冠肺炎" OR "2019-nCoV" OR "2019-CoV" OR "SARS-CoV-2" OR "COVID19" OR "COVID-19" OR "COVID2019" OR "COVID-2019") AND "疫苗" |
